# Supplementary material for: T Cells Detect Intracellular DNA but Fail to Induce Type I IFN Responses: Implications for Restriction of HIV Replication
Source: PubMed Central journal article supplement (PMC3880311; doi:10.1371/journal.pone.0084513), 2014-01-03

**A**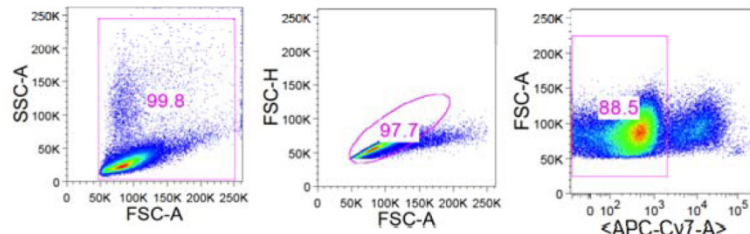**B**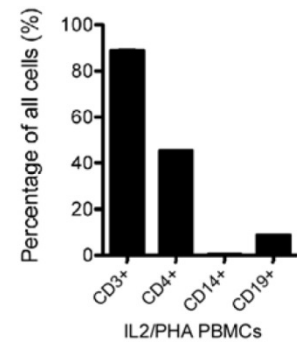**C**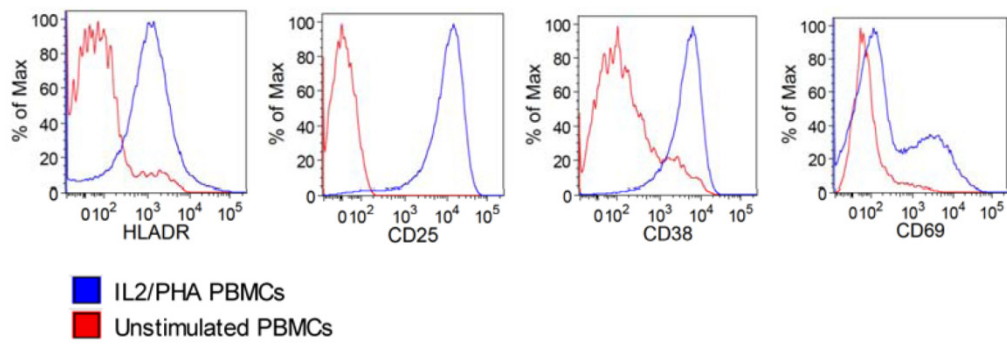

Supplement: pone.0084513.s001.pdf [file pone.0084513.s001.pdf]
